# Supplementary material
Source: publisher site journal article supplement (https://www.dovepress.com/article/234178)
Supplement: Supplementary file 1 [file get_supplementary_file.php]

**Supplement Table 1. Billing codes used to define surgical treatment**

| **Code type** | **Code** |
| --- | --- |
| **Prostatectomy** | |
| CPT | 55801: prostatectomy, perineal, subtotal |
| 55810: prostatectomy, perineal radical |
| 55812: prostatectomy, perineal radical; with lymph node biopsy(s) |
| 55815: prostatectomy, perineal radical; with bilateral pelvic lymphadenectomy |
| 55840: prostatectomy, retropubic radical, with or without nerve sparing |
| 55842: prostatectomy, retropubic radical, with or without nerve sparing; with lymph node biopsy(s) |
| 55845: prostatectomy, retropubic radical, with or without nerve sparing; with bilateral pelvic lymphadenectomy |
| 55866: laparoscopy, surgical prostatectomy, retropubic radical, including nerve sparing, includes robotic assistance, when performed |
| ICD10 | 0V500ZZ: destruction of prostate, open approach |
| 0V503ZZ: destruction of prostate, percutaneous approach |
| 0V504ZZ: destruction of prostate, percutaneous endoscopic approach |
| 0V507ZZ: destruction of prostate, via natural or artificial opening |
| 0V508ZZ: destruction of prostate, via natural or artificial opening endoscopic |
| 0VB00ZX: excision of prostate, open approach, diagnostic |
| 0VB00ZZ: excision of prostate, open approach |
| 0VB03ZX: excision of prostate, percutaneous approach, diagnostic |
| 0VB03ZZ: excision of prostate, percutaneous approach |
| 0VB04ZX: excision of prostate, percutaneous endoscopic approach, diagnostic |
| 0VB04ZZ: excision of prostate, percutaneous endoscopic approach |
| 0VB07ZX: excision of prostate, via natural or artificial opening, diagnostic |
| 0VB07ZZ: excision of prostate, via natural or artificial opening |
| 0VB08ZX: excision of prostate, via natural or artificial opening endoscopic, diagnostic |
| 0VB08ZZ: excision of prostate, via natural or artificial opening endoscopic |
| 0VC00ZZ: extirpation of matter from prostate, open approach |
| 0VC03ZZ: extirpation of matter from prostate, percutaneous approach |
| 0VC04ZZ: extirpation of matter from prostate, percutaneous endoscopic approach |
| 0VC07ZZ: extirpation of matter from prostate, via natural or artificial opening |
| 0VC08ZZ: extirpation of matter from prostate, via natural or artificial opening endoscopic |
| 0VT00ZZ: resection of prostate, open approach |
| 0VT04ZZ: resection of prostate, percutaneous endoscopic approach |
| 0VT07ZZ: resection of prostate, via natural or artificial opening |
| ICD9 | 17.41: open robotic assisted procedure |
| 17.42: laparoscopic robotic assisted procedure |
| 17.44: endoscopic robotic assisted procedure |
| 17.49: other and unspecified robotic assisted procedure |
| 54.21: laparoscopy |
| 60.5: radical prostatectomy |
| 60.62: perineal prostatectomy |

CPT = Current Procedural Terminology; ICD-9 = International Classification of Disease

**Supplement Table 2. Domain dictionary for urinary incontinence**

| **Term** |
| --- |
| incontinence |
| incontinent |
| weak incontinence |
| incontinence of urine |
| leakage |
| any leaks |
| any leak |
| significant problems with lower urinary tract symptoms |
| significant lower urinary tract symptoms |
| significant problems with urinary tract symptoms |
| lower urinary tract symptom |
| lower urinary tract symptoms |
| urinary tract symptoms |
| any voiding issues |
| urine leak |
| urinary leakage |
| urine leaking |
| urine leakage |
| urinary incontinence |
| urinary and fecal incontinence |
| urinary or fecal incontinence |
| urge incontinence |
| stress incontinence |
| stress urine incontinence |
| urinary stress incontinence |
| stress urinary incontinence |
| stress or urge incontinence |
| urge or stress incontinence |
| involuntary urination |
| unable to hold urine |
| unable to control bladder |
| bladder control |
| bladder incontinence |
| unable to prevent bladder emptying |
| loss of bladder control |
| significant lower urinary tract symptoms |
| loss of urinary control |
| pads |
| pad |
| diapers |
| diaper |
| wears diaper |
| wear diapers |
| wears a diaper |
| wears a pad |
| wear a diaper |
| wears diapers |
| post micturition dribbling |
| post-micturition dribbling |
| post void dribbling |
| post-void dribbling |
| post-void leakage |
| post void leakage |
| postvoid dribbling |
| dribbles postvoid |
| dribbles post-void |
| post-void dribble |
| post-void dribbles |
| postvoid dribble |
| postvoid dribbles |
| Incontinence: 0 |
